# Supplementary material for: Ring quantum cascade lasers with twisted wavefronts
Source: PubMed Central journal article supplement (PMC5964118; doi:10.1038/s41598-018-26267-x), 2018-05-22
Supplement: 41598_2018_26267_MOESM1_ESM.pdf [file 41598_2018_26267_MOESM1_ESM.pdf]

# Supplementary Information: Ring quantum cascade lasers with twisted wavefronts

Rolf Szedlak<sup>1,\*</sup>, Thomas Hisch<sup>2</sup>, Benedikt Schwarz<sup>1</sup>, Martin Holzbauer<sup>1</sup>, Donald MacFarland<sup>1</sup>, Tobias Zederbauer<sup>1</sup>, Hermann Detz<sup>3</sup>, Aaron Maxwell Andrews<sup>1</sup>, Werner Schrenk<sup>1</sup>, Stefan Rotter<sup>2</sup>, and Gottfried Strasser<sup>1</sup>

<sup>1</sup>Institute of Solid State Electronics & Center for Micro- and Nanostructures, TU Wien, Floragasse 7, 1040 Vienna, Austria

<sup>2</sup>Institute for Theoretical Physics, TU Wien, Wiedner-Hauptstraße 8-10/136, 1040 Vienna, Austria

<sup>3</sup>Austrian Academy of Sciences, Dr. Ignaz Seipel-Platz 2, 1010 Vienna, Austria

\*rolf.szedlak@tuwien.ac.at

## ABSTRACT

We demonstrate the on-chip generation of twisted wavefront beams from ring quantum cascade lasers. A monolithic gradient index metamaterial is fabricated directly into the substrate side of the semiconductor chip and induces a twist of the light's wavefront. This significantly influences the obtained beam pattern, which changes from a central intensity minimum to a maximum depending on the discontinuity count of the metamaterial. Our design principle provides an interesting alternative to recent implementations of microlasers operating at an exceptional point.

Figure 1 shows the simulated interference patterns of Gaussian orbital angular momentum (OAM) beams with different topological charges.

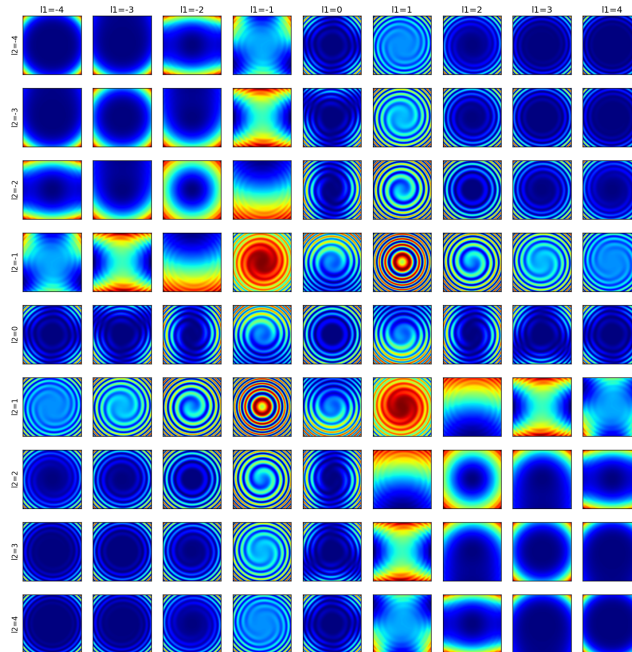

**Figure 1.** Interference pattern of Gaussian beams with different topological charges. Distinct spiral patterns are visible.

Figure 2 shows the simulated interference patterns of ring emitter orbital angular momentum (OAM) beams with different topological charges.

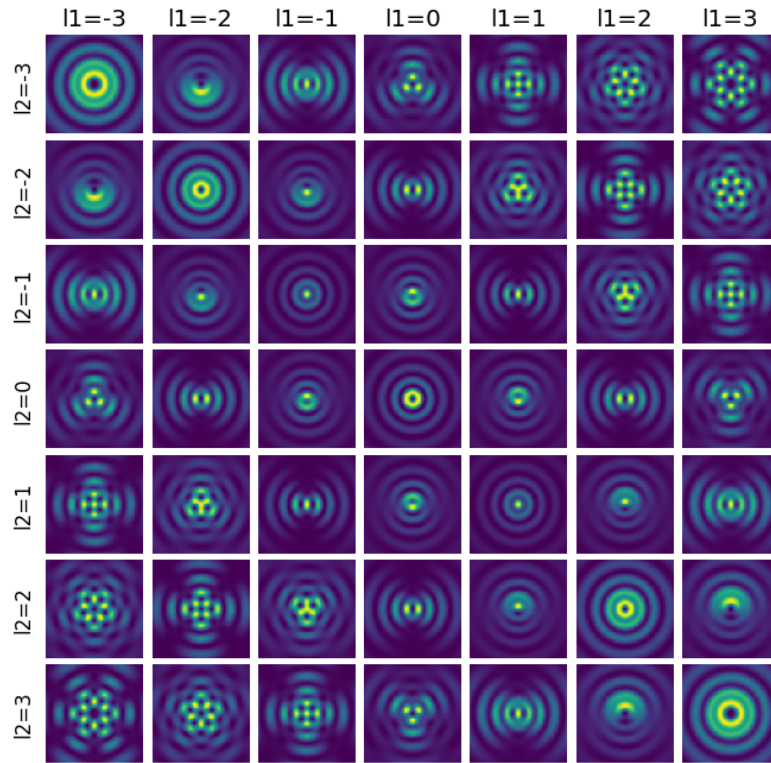

**Figure 2.** Interference pattern of ring emitter beams with different topological charges. No spiral patterns are visible.
